# Supplementary material
Source: PubMed Central journal article supplement (PMC4216247)
Supplement: supp_141036_chronic-cohen-1-at.pdf [file supp_141036_chronic-cohen-1-at.pdf]

| <b>Appendix 1 (as provided by the authors):</b> Comparing the needs of children and adults with medical complexity |                                                                                                                                                                                                                                                                                                                                                                                     |                                                                                                                                                                     |
|--------------------------------------------------------------------------------------------------------------------|-------------------------------------------------------------------------------------------------------------------------------------------------------------------------------------------------------------------------------------------------------------------------------------------------------------------------------------------------------------------------------------|---------------------------------------------------------------------------------------------------------------------------------------------------------------------|
|                                                                                                                    | Children with medical complexity                                                                                                                                                                                                                                                                                                                                                    | Adults with medical complexity                                                                                                                                      |
| <b>Illustrative Cases(s)</b>                                                                                       | a) Child with severe cerebral palsy and comorbidities (e.g. seizures, gastroesophageal reflux, scoliosis and recurrent aspiration pneumonia)<br>b) Youth with multiple congenital anomalies (e.g. complex congenital heart disease, cleft palate, genitourinary anomalies)<br>c) Premature infant with chronic lung disease, short gut and dependence on total parenteral nutrition | Seniors with multiple morbidities (e.g. congestive heart failure, chronic obstructive pulmonary disease, obesity, hypertension, diabetes, osteoporosis, depression) |
| <b>Diagnostic groups</b>                                                                                           | Extremely diverse; many with rare underlying conditions                                                                                                                                                                                                                                                                                                                             | Relatively more homogeneous groupings of multi-morbidities                                                                                                          |
| <b>Population Prevalence</b>                                                                                       | Low                                                                                                                                                                                                                                                                                                                                                                                 | High                                                                                                                                                                |
| <b>Mortality Rates</b>                                                                                             | Low (~2.5% over two years) <sup>1</sup>                                                                                                                                                                                                                                                                                                                                             | High                                                                                                                                                                |
| <b>Types of Care settings</b>                                                                                      | Home, Hospital, School, limited Long-term care facilities                                                                                                                                                                                                                                                                                                                           | Home, Hospital, Long-term care facilities                                                                                                                           |
| <b>Type of primary care</b>                                                                                        | Diversity of models across the country including family physician, pediatrician and hospital-based programs                                                                                                                                                                                                                                                                         | Family physician, increasingly in multidisciplinary teams                                                                                                           |
| <b>Role of ‘generalist’ subspecialist</b>                                                                          | Virtually all receive some form of care from a general pediatrician (either consulting in collaboration with family physicians or primary pediatric care)                                                                                                                                                                                                                           | Many receive care from general internists and/or geriatricians, but usually in consulting role                                                                      |
| <b>Role of subspecialists</b>                                                                                      | Large; frequently in tertiary care hospitals                                                                                                                                                                                                                                                                                                                                        | Varied, but much larger community presence                                                                                                                          |

## Reference

1. Cohen E, Berry JG, Camacho X, et al. Patterns and costs of health care use of children with medical complexity. *Pediatrics* 2012;130:e1463-70.
